# Supplementary material
Source: PubMed Central journal article supplement (PMC2040904)
Supplement: pnas_0705049104_1.pdf [file pnas_0705049104_1.pdf]

Human 1 -----MSDNQSWNSSGSEEDPETES--GPPVERCGVLSKWTNYIHGWQDRVVVLKNNALSYYKSEDETEYGCGRSICLSKAVIT  
Mouse 1 -----MSDNQSWNSSGSEEDPETES--GPPVERCGVLSKWTNYIHGWQDRVVVLKNNALSYYKSEDETEYGCGRSICLSKAVIT  
Zebrafish 1 -----MSDCSSSGSD<sup>D</sup>EDLPES--ELLDELGGKLSKWTNYIHGWQDRWIALKGNILSYYS<sup>R</sup>SADEKEYGCGRSICLSKAVIT  
Drosophila 1 MDTNAGESLGASPPSSNEAAAGSQSQSDASEEEYLDNSTELRGLYLSKWTNYIYGWQPRYIVLKDGTLSYYKSESESDFGCRGATSLTKATIK

Human 80 DFDECRFDISVN-DSVWYLRAQDPDHRQQWIDAIEQHKTESGYGSESSLRRHGSMSVSLVSGASGYSATSTSSFKKGHSLREKLAEMETFRDIL  
Mouse 80 DFDECRFDISVN-DSVWYLRAQDPEHRQQWVDAIEQHKTESGYGSESSLRRHGSMSVSLVSGASGYSATSTSSFKKGHSLREKLAEMETFRDIL  
Zebrafish 77 EFDECRFDISVN-DS<sup>I</sup>WYLRAEHP<sup>L</sup>LRQQWID<sup>T</sup>IELHKAESGYGSESSLRRHGS<sup>L</sup>LSLTS<sup>A</sup>AASGL<sup>S</sup>TAS<sup>A</sup>SSL<sup>L</sup>KKAYS<sup>L</sup>QEKLAEMETFRDIL  
Drosophila 96 ESDELRF<sup>D</sup>V<sup>V</sup>VN<sup>N</sup>LNNW<sup>C</sup>LRAETS<sup>E</sup>DR<sup>M</sup>H<sup>W</sup>DV<sup>L</sup>QLYK<sup>A</sup>D<sup>S</sup>G<sup>S</sup>T<sup>D</sup>T<sup>T</sup>SLRRHGS<sup>T</sup>MSL<sup>Q</sup>SNTISL<sup>T</sup>SG-<sup>G</sup>SL<sup>K</sup>KT<sup>Q</sup>R<sup>N</sup>LREK<sup>V</sup>GE<sup>T</sup>ET<sup>F</sup>K<sup>D</sup>IL

Human 174 QVDTLQKYFDACADAVSKDELQRDKVVEDDEDDFP<sup>T</sup>TRSDGDFLH<sup>S</sup>TNGNKEKLFPHVTPKGINGIDFKGEAITFKATTAGILATLSHCIELM  
Mouse 174 QVDTLQKYFDV<sup>C</sup>ADAVSKDELQRDKVVEDDEDDFP<sup>T</sup>TRSDGDFLH<sup>N</sup>TNGNKEKLFPHVTPKGINGIDFKGEAITFKATTAGILATLSHCIELM  
Zebrafish 171 QVDTLQKYFDN<sup>C</sup>ADTESKDELHRDKV<sup>S</sup>DEEEDFP<sup>T</sup>LRPDADYLL<sup>N</sup>NNNS<sup>S</sup>KEK<sup>S</sup>EFV<sup>N</sup>T<sup>L</sup>KDPA<sup>G</sup>IDFKGEAITFKATTAGIL<sup>S</sup>TLSHCIDIL  
Drosophila 190 QIETLQRYFDACSEVN-----K-N-----NAQ<sup>P</sup>LDLGD<sup>G</sup>LK<sup>S</sup>IDFKGESITFRATTS<sup>G</sup>V<sup>L</sup>T<sup>T</sup>LQHCLEI<sup>I</sup>

Human 269 REDSWQKRLDKETEKKRRTEEAYKNAMTELKKKS--HFGGPDYEEGPN<sup>S</sup>LINEEEFFDAVEAALDRQDKIEEQSQSEK<sup>V</sup>RLHWPTSLPSGDA<sup>F</sup>  
Mouse 269 REESWQKR<sup>H</sup>DR<sup>E</sup>VEKRRRVEEAYKN<sup>V</sup>M<sup>E</sup>ELKKKP--RFGGPDYEEGPN<sup>S</sup>LINEEEFFDAVEAALDRQDKIEEQSQSEK<sup>V</sup>RLHWPTSLPSGDT<sup>F</sup>  
Zebrafish 266 REESWQKRLDK<sup>E</sup>IERRRRAEDAYKA<sup>A</sup>TELKKKP--HYGGPDYEEGPN<sup>S</sup>LINEEEFFDAVEAALDK<sup>H</sup>DQIEEQSQ<sup>V</sup>ERSR<sup>A</sup>S<sup>R</sup>QISL<sup>T</sup>P-D<sup>T</sup>F  
Drosophila 251 SDES<sup>W</sup>K<sup>R</sup>KL<sup>E</sup>REID<sup>K</sup>RRRSE<sup>D</sup>QSK<sup>K</sup>LK<sup>D</sup>EVEK<sup>M</sup>K<sup>R</sup>LSY<sup>P</sup>GP<sup>D</sup>FE<sup>E</sup>GP<sup>H</sup>ST<sup>L</sup>PE<sup>D</sup>EFFDAVETGLDKIEEDM<sup>Q</sup>L<sup>R</sup>F<sup>K</sup>L<sup>K</sup>L<sup>Q</sup>S<sup>Q</sup>IS<sup>Q</sup>T<sup>L</sup>VN-V<sup>P</sup>H

Human 362 VGTHRFVQK-----VEEMVQN<sup>H</sup>MTYSLQDVGGDAN-WQLVVEEGEMK<sup>V</sup>YRREVEENGIVLDPLKATHAVKGV  
Mouse 362 VGTHRFVQK<sup>P</sup>Y<sup>S</sup>R<sup>S</sup>SS<sup>S</sup>M<sup>S</sup>SI<sup>D</sup>LV<sup>S</sup>ASDDVHR<sup>F</sup>SSQVEEMVQN<sup>H</sup>M<sup>N</sup>YSLQDVGGDAN-WQLVVEEGEMK<sup>V</sup>YRREVEENGIVLDPLKATHAVKGV  
Zebrafish 358 ISTQKYLTKPH<sup>S</sup>HTSS<sup>L</sup>SSV<sup>D</sup>L<sup>S</sup>ASDDVHR<sup>F</sup>SAQVEEMV<sup>H</sup>S<sup>H</sup>MTYSLQDVGGDAN-WQLVVEEG<sup>D</sup>MK<sup>V</sup>YRREVEENGIVLDPLKATHAVKGV  
Drosophila 345 VAEGEEAREE<sup>F</sup>FG-----TGAEATSHALWPEIDRVCKEQLHYAREGVGQD<sup>G</sup>NGWQIFADEGE<sup>I</sup>K<sup>M</sup>Y<sup>K</sup>REEEV<sup>N</sup>GL<sup>V</sup>MDPLKAVHTVQGV

Human 430 HEVCN<sup>Y</sup>FWNV<sup>D</sup>VRNDWETTIE<sup>N</sup>FHV<sup>V</sup>ETLADN<sup>A</sup>II<sup>Y</sup>QTHKRV<sup>P</sup>ASQ<sup>R</sup>DVLY<sup>L</sup>SVIRKIPALTENDP-ETWIVCN<sup>F</sup>SV<sup>D</sup>H<sup>D</sup>SAPLNN-RCV<sup>R</sup>  
Mouse 456 HEVCN<sup>Y</sup>FWNV<sup>D</sup>VRNDWETTIE<sup>N</sup>FHV<sup>V</sup>ETLADN<sup>A</sup>II<sup>V</sup>YQTHKRV<sup>P</sup>ASQ<sup>R</sup>DVLY<sup>L</sup>SAIRKIPALTENDP-ETWIVCN<sup>F</sup>SV<sup>D</sup>H<sup>D</sup>SAPLNN-RCV<sup>R</sup>  
Zebrafish 452 HEVCH<sup>Y</sup>FW<sup>D</sup>TAY<sup>R</sup>NDWETT<sup>V</sup>ES<sup>F</sup>Q<sup>V</sup>VETLSD<sup>Q</sup>AC<sup>I</sup>I<sup>H</sup>Q<sup>T</sup>LKRV<sup>P</sup>ASQ<sup>R</sup>DVLY<sup>V</sup>SVMRKILSTNENDP-DTWLVCN<sup>F</sup>SV<sup>D</sup>H<sup>D</sup>GY<sup>P</sup>PST-RCI<sup>R</sup>  
Drosophila 430 REMCH<sup>Y</sup>F<sup>F</sup>MPE<sup>F</sup>FRNDWETT<sup>L</sup>EDCTILEKISADTLLFLQTHKR<sup>I</sup>WPASQ<sup>R</sup>DAQ<sup>F</sup>WSHMRKITDNLEPGARD<sup>M</sup>WVVCNNST<sup>E</sup>YAKQESK<sup>N</sup>GK<sup>C</sup>V<sup>R</sup>

Human 523 INVAMICQTLVSPPEGN-QEISRDN<sup>I</sup>LCKITYVANVNP<sup>G</sup>GWAPASVLR<sup>A</sup>VAKREY<sup>P</sup>KFLKRFTSYVQEKTAGK<sup>P</sup>ILF  
Mouse 549 IN<sup>I</sup>VAMICQTLVSPPEGD-QEISRDN<sup>I</sup>LCKITYVANVNP<sup>G</sup>GWAPASVLR<sup>A</sup>VAKREY<sup>P</sup>KFLKRFTSYVQEKTAGK<sup>P</sup>ILF  
Zebrafish 545 INVAMICQTL<sup>S</sup>SPPEGD-KEISRDN<sup>I</sup>LCKITYVANVNP<sup>G</sup>GWAPASVLR<sup>A</sup>VAKREY<sup>P</sup>KFLKRFTSYVQEK<sup>T</sup>SSEAILF  
Drosophila 525 LTVILACQ<sup>T</sup>HLPEGYVKGQ<sup>P</sup>LN<sup>R</sup>NDL<sup>T</sup>CKITYCSV<sup>V</sup>NP<sup>G</sup>GWAPASALRAV<sup>Y</sup>KREY<sup>P</sup>KFLKRFTGYV<sup>I</sup>DQCKDK<sup>P</sup>IMF
