# Supplementary material
Source: PubMed Central journal article supplement (PMC2040904)

**A***w1118*      *dcert<sup>1</sup>*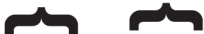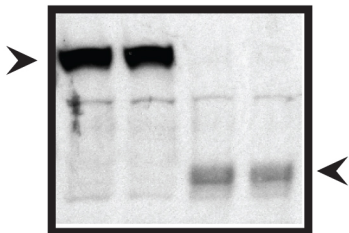**B***w1118*      *dcert<sup>1</sup>*

Dcert

CDase

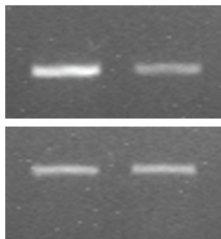**C**

kDa

Dcert      Dcert<sup>1</sup>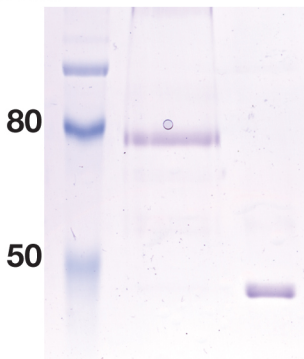**D**

pmoles of ceramide  
transferred/pmol of protein/15minutes

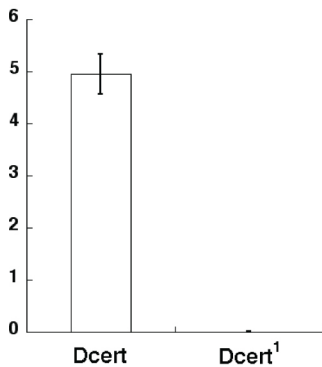

Supplement: pnas_0705049104_3.pdf [file pnas_0705049104_3.pdf]
