# Supplementary material
Source: PubMed Central journal article supplement (PMC2040904)
Supplement: pnas_0705049104_7.pdf [file pnas_0705049104_7.pdf]

**Wild type**

***dcert<sup>1</sup>***

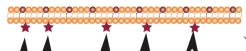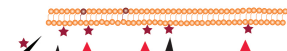

→ **LACK OF DCERT RESULTS IN DECREASED CPE IN PLASMA MEMBRANE AND INCREASED FLUIDITY**  
→ **INCREASED SUSCEPTIBILITY TO REACTIVE OXYGEN SPECIES**

**Attack by Free Radicals (ROS)**

**Attack by ROS & lipid peroxides including 4-HNE, aldehydes and reactive carbonyls**

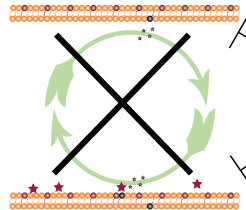

**Anti-oxidant Mechanisms**

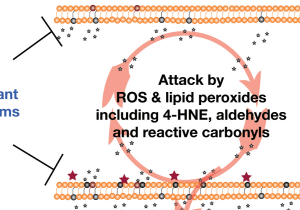

→ **INCREASED LIPID PEROXIDATION e.g., 4-HNE and carbonyls**

→ **INCREASED OXIDATIVE STRESS e.g. hydroxynonylation and carbonylation of proteins**

**PHYSIOLOGICAL**

**PATHOLOGICAL**

**NORMAL METABOLISM**

**METABOLIC DYSFUNCTION**

**DECREASED ATP PRODUCTION    GLUCOSE IMBALANCE**

**NORMAL LIFE SPAN**

**ACCELERATED AGING LIKE PHENOMENON AND DEATH**

- ★ Reactive oxygen species
- CPE
- Oxidized lipids
- Lipid peroxidation products - e.g., 4-HNE, aldehydes and reactive carbonyls
