# Supplementary material
Source: PubMed Central journal article supplement (PMC2040904)

**A**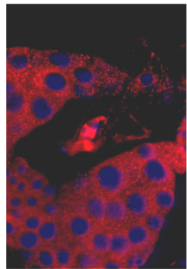**Dcert + DAPI****B**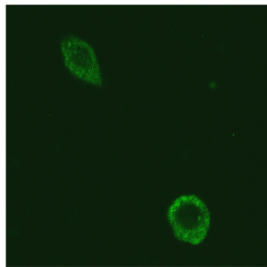**Dcert**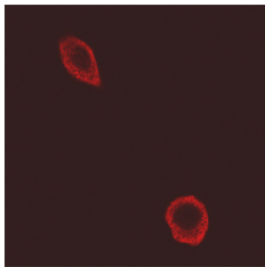**Calnexin**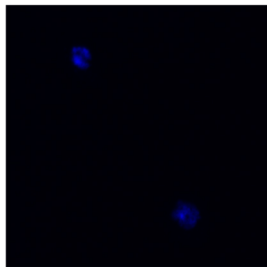**DAPI**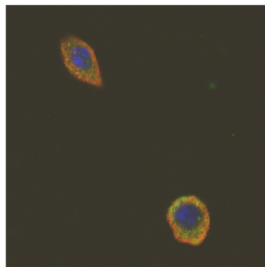**Overlay****C**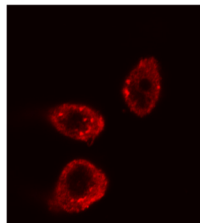**Dcert**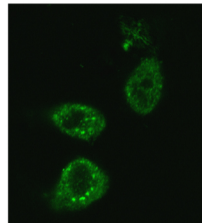**Golgi**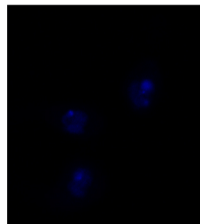**DAPI**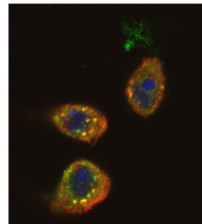**Overlay****Fig. 8**

Supplement: pnas_0705049104_2.pdf [file pnas_0705049104_2.pdf]

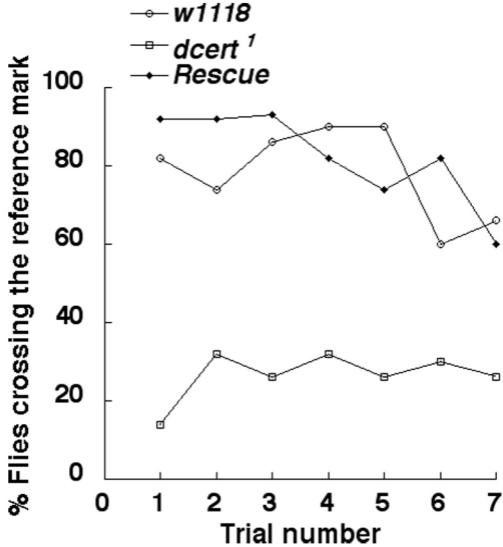

Supplement: pnas_0705049104_4.pdf [file pnas_0705049104_4.pdf]

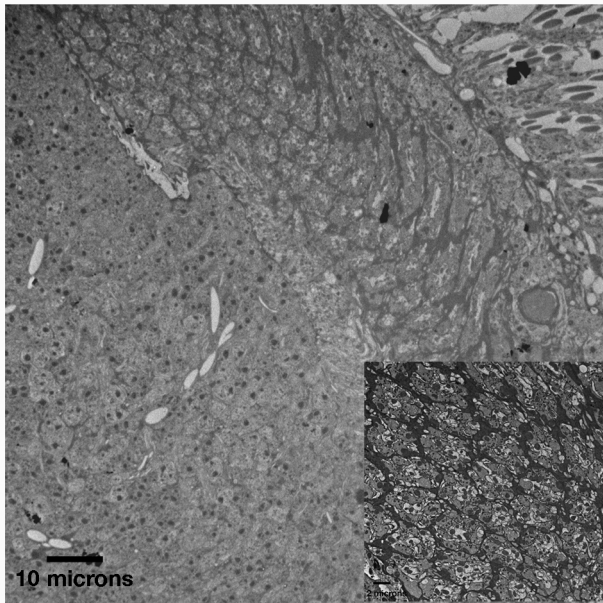

*w1118*

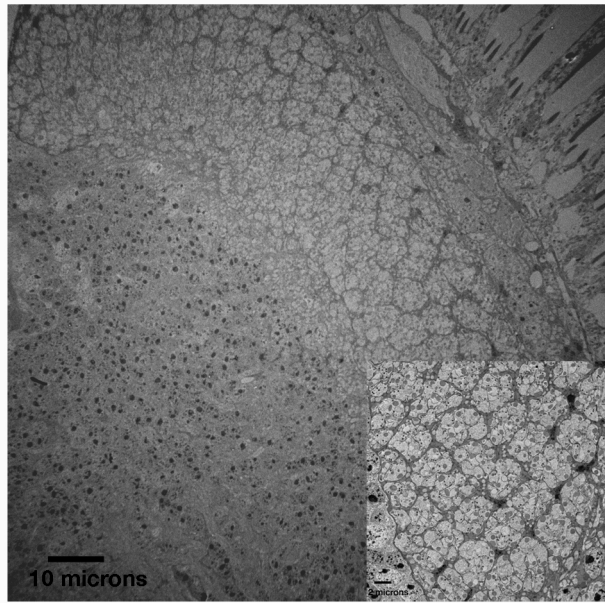

*dcert1*

Fig. 11

Supplement: pnas_0705049104_5.pdf [file pnas_0705049104_5.pdf]

**A**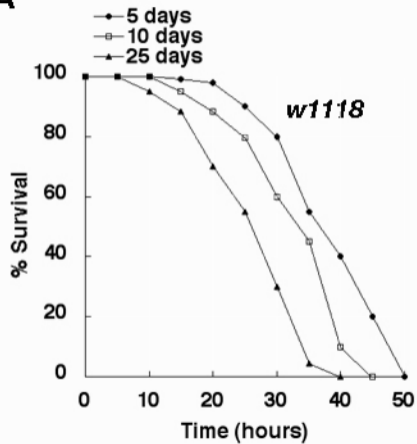**B**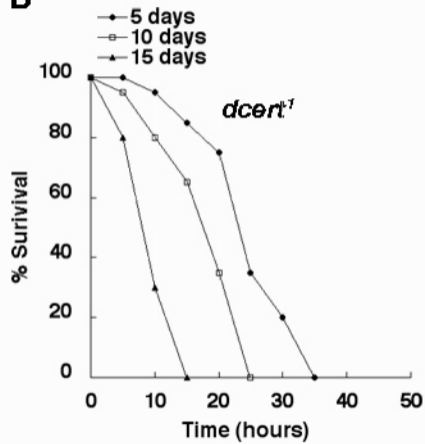**C**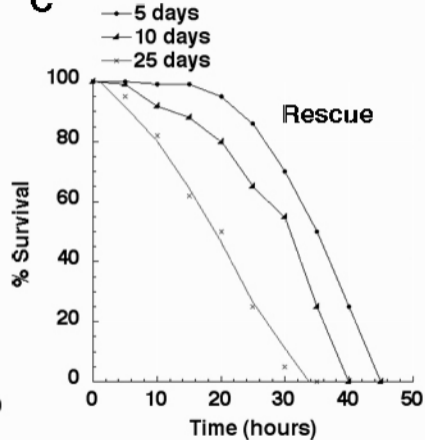

Supplement: pnas_0705049104_6.pdf [file pnas_0705049104_6.pdf]
